# Supplementary material for: CD47-ligation induced cell death in T-acute lymphoblastic leukemia
Source: PubMed Central journal article supplement (PMC5945676; doi:10.1038/s41419-018-0601-2), 2018-05-10
Supplement: 41419_2018_601_MOESM1_ESM.pdf [file 41419_2018_601_MOESM1_ESM.pdf]

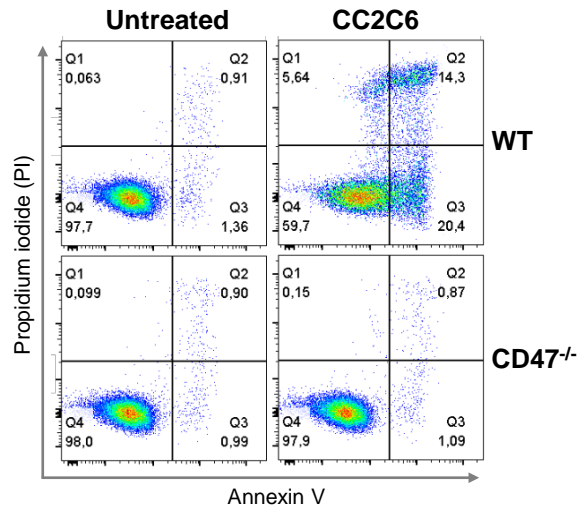

Supp Figure 1

**A**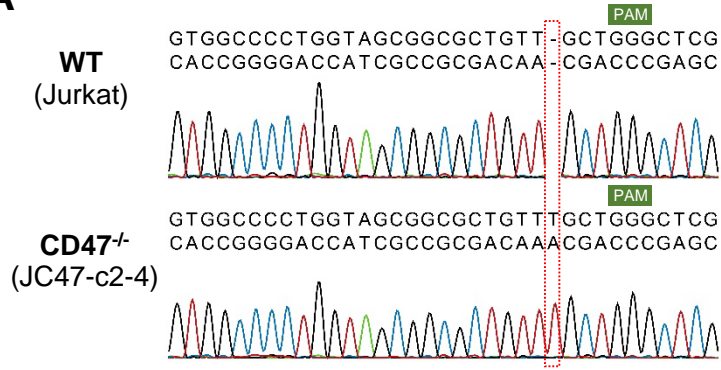**B**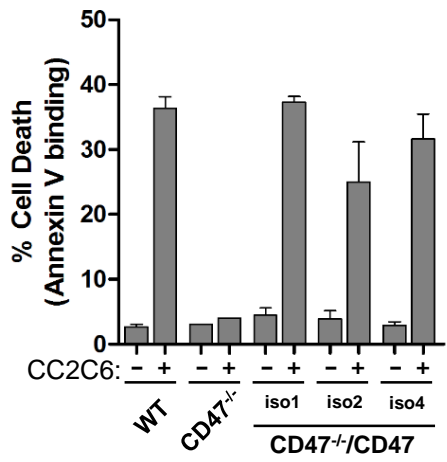**C**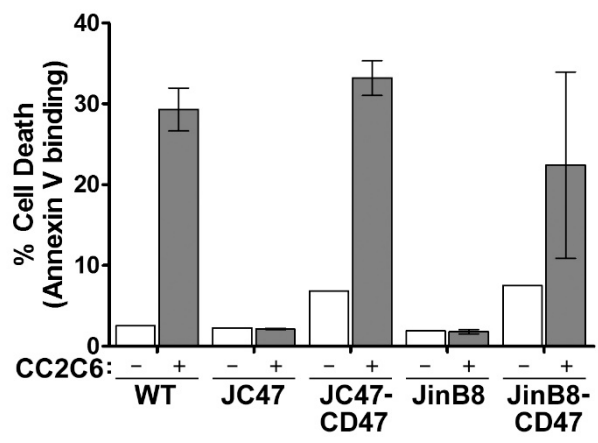**Supp Figure 2**

**A**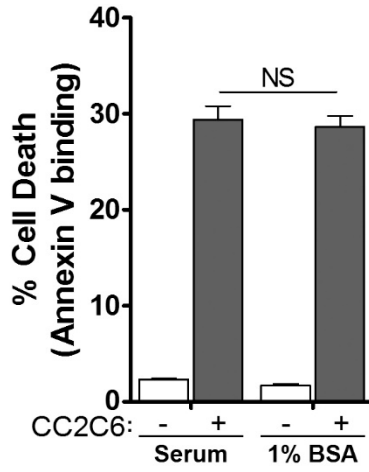**B**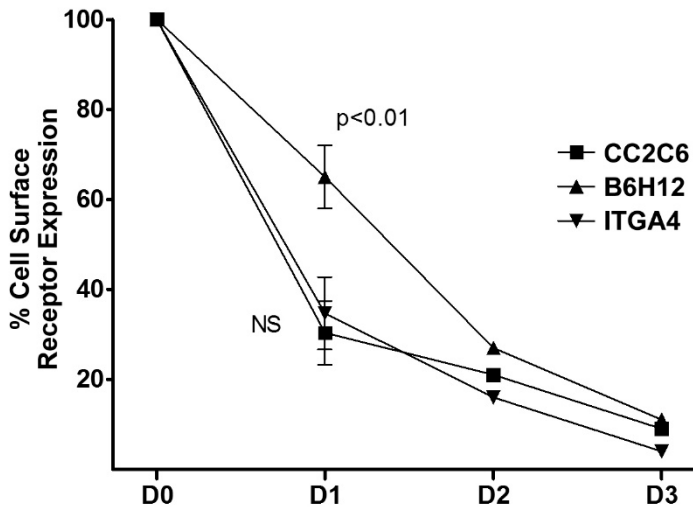**C**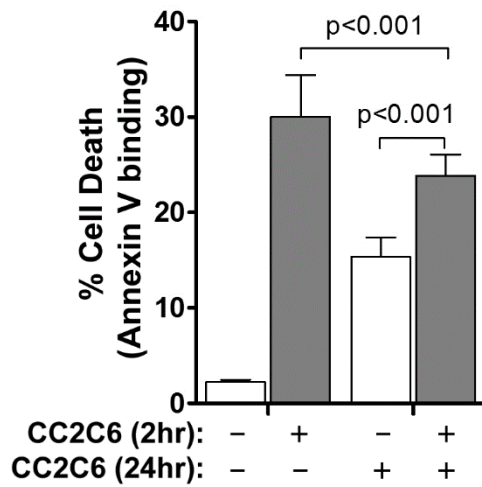**Supp Figure 3**

**A**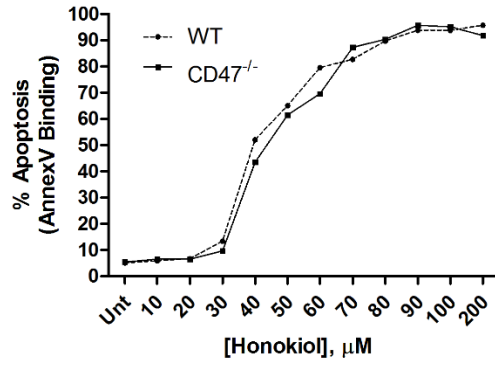**B**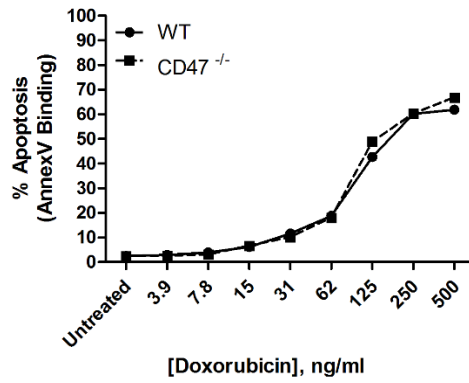**C**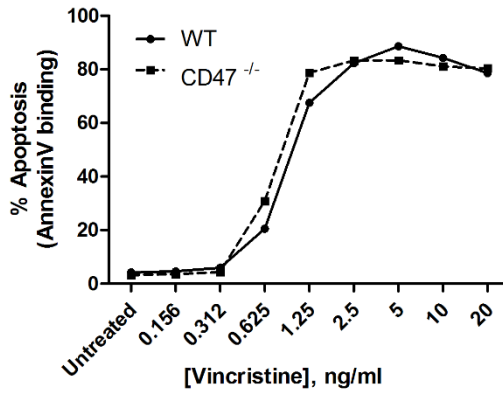**Supp Figure 4**

**A**

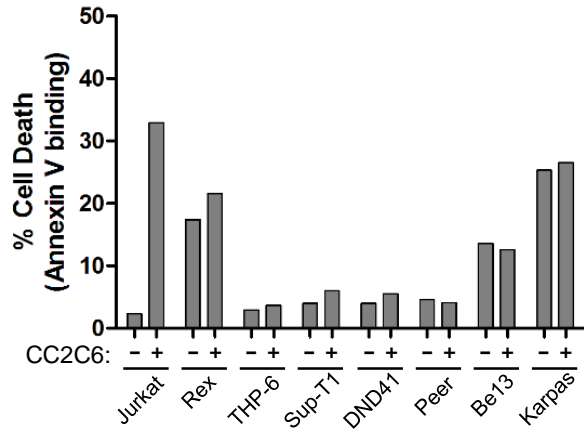

**B**

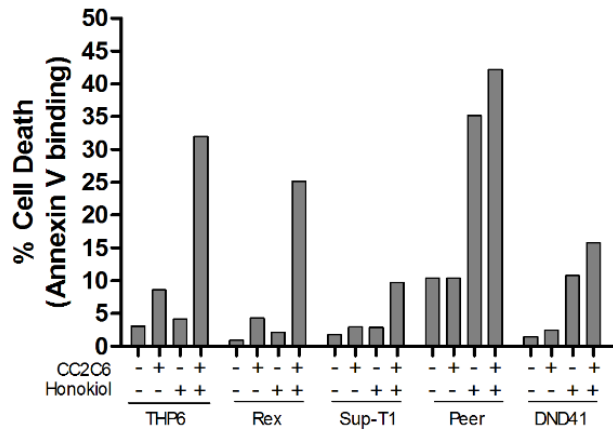

**Supp Figure 5**

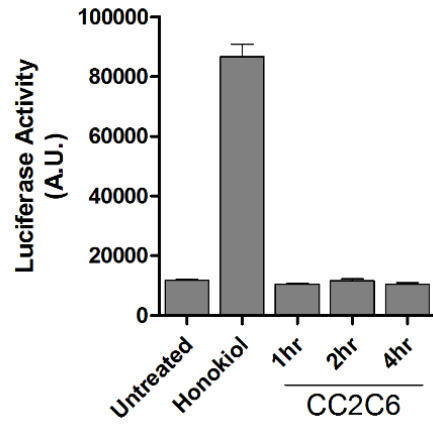

**Supp Figure 6**
